# Supplementary material for: Elucidating the leaching effect of micro-/nano-plastics on the binding, structural, and oxidative characteristics of bovine serum albumin and its impact on cytotoxicity and oxidative stress in the human lung cancer cell line A549
Source: Royal Society of Chemistry journal article supplement (doi:10.1039/d5en00071h), 2025-01-01
Supplement: d5en00071h1.pdf [file d5en00071h1.pdf]

## Supplementary Materials

**Supplementary Figure 1.** Physicochemical characteristics of PET MNPs (a) TEM, (b) particle size distribution, (c) EDX spectrum, (d) BET sorption/desorption isotherms, (e) FTIR spectrum (Figures from our previous work (<https://doi.org/10.1002/tox.24366>)<sup>34</sup>).

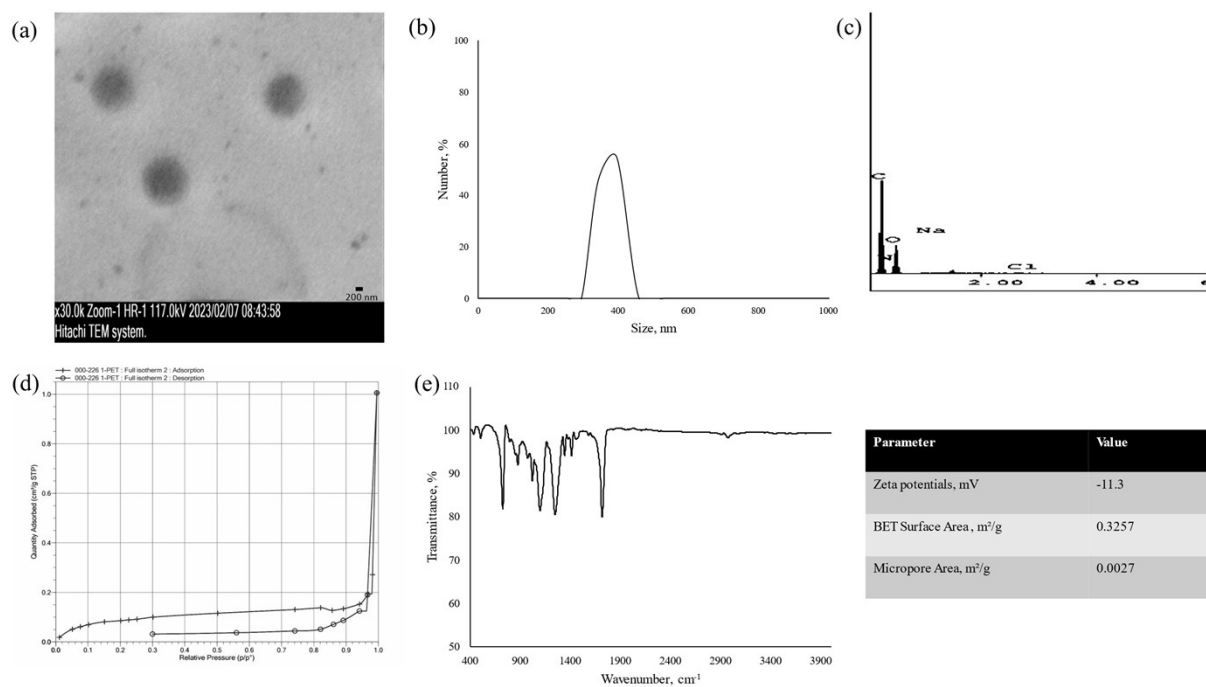

**Supplementary Figure 2.** Experimental set-up for the MNP-BSA interaction

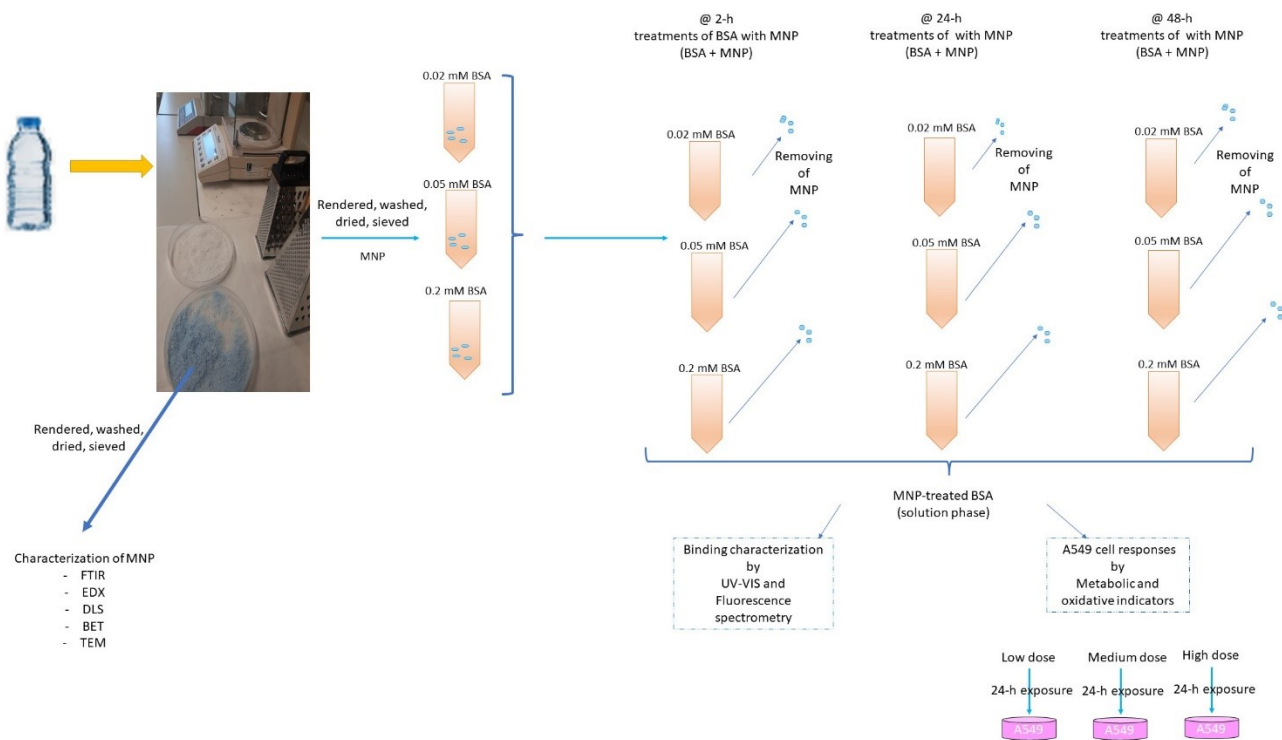

**Supplementary Figure 3.** UV-VIS spectra of BSA standards at the concentration of 0.02 mM, 0.05 mM and 0.2 mM.

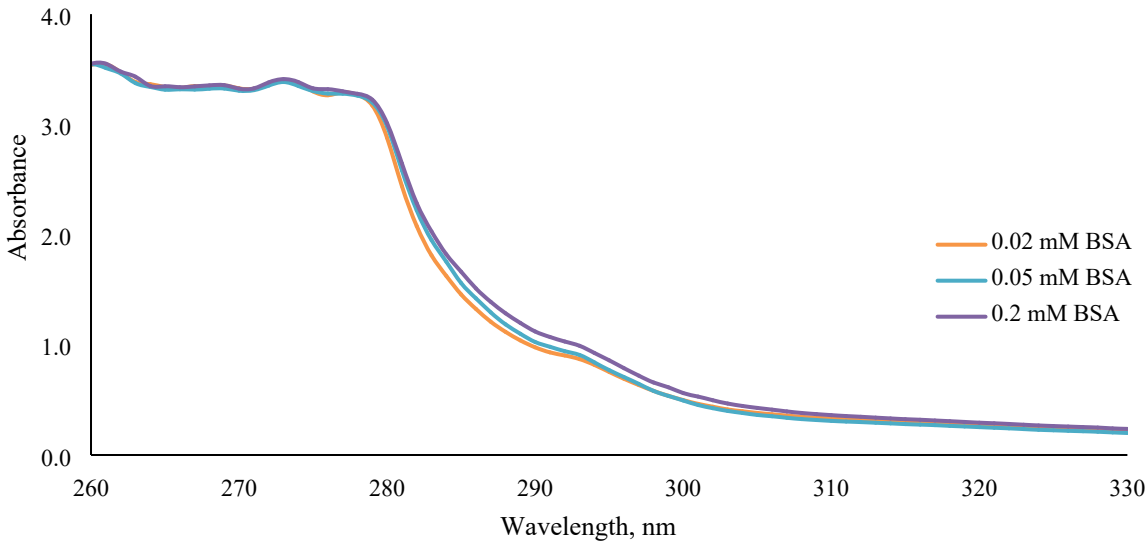

**Supplementary Figure 4.** Fluorescence spectra of BSA standards at the concentration of 0.02 mM, 0.05 mM and 0.2 mM.

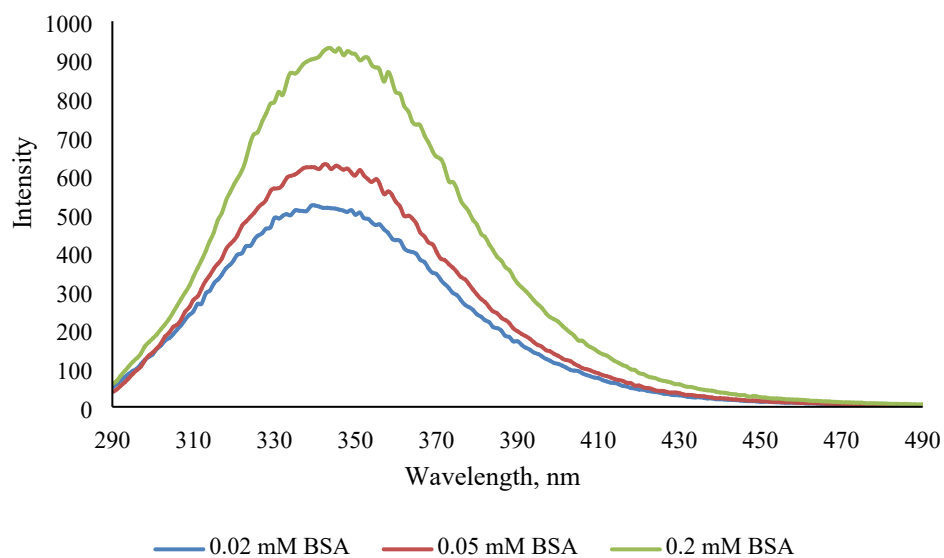

**Supplementary Figure 5.** Correlation and heat map between the cytotoxic (MTT, CCK-8 and LDH levels) and oxidative stress indicators of A549 cell. (a) PET MNP treatment stage relationship, (b) BSA concentration relationship

(a)

| Parameters | 2 h PET MNP treatment |        |       | 24 h PET MNP treatment |        |       | 48 h PET MNP treatment |        |       |
|------------|-----------------------|--------|-------|------------------------|--------|-------|------------------------|--------|-------|
|            | Low                   | Medium | High  | Low                    | Medium | High  | Low                    | Medium | High  |
| MTT-CCK    | 0.87                  | -0.03  | 0.99  | -0.99                  | 0.02   | -0.46 | 1.00                   | 0.98   | 0.95  |
| MTT-LDH    | 0.97                  | 0.92   | 0.83  | -0.58                  | 0.84   | 0.65  | -0.37                  | 1.00   | -0.18 |
| MTT-ROS    | 0.36                  | 0.93   | 0.51  | -0.37                  | -0.83  | -0.47 | 0.68                   | -0.70  | -0.70 |
| MTT-AOX    | -0.34                 | -0.70  | 0.22  | -0.91                  | 0.30   | -0.06 | 0.94                   | -0.51  | 0.37  |
| MTT-SOD    | 0.97                  | -0.92  | 0.69  | -0.24                  | -0.92  | 0.90  | 0.80                   | -0.84  | -0.92 |
| MTT-GLU    | -0.93                 | 0.24   | 0.82  | 0.90                   | 0.65   | 0.80  | -0.22                  | -0.72  | 0.66  |
| CCK-ROS    | 0.74                  | 0.98   | 0.56  | -0.01                  | -0.73  | -0.42 | 0.68                   | -0.74  | -0.83 |
| CCK-AOX    | -0.75                 | -0.70  | 0.34  | 0.96                   | 0.96   | 0.91  | 0.94                   | -0.65  | 0.64  |
| CCK-SOD    | 0.97                  | 0.42   | 0.60  | 0.12                   | 0.37   | -0.02 | 0.80                   | -0.93  | -0.76 |
| CCK-GLU    | -0.99                 | 0.96   | 0.74  | -0.95                  | 0.77   | 0.17  | -0.49                  | -0.63  | 0.93  |
| LDH-CCK    | 0.97                  | 0.36   | 0.75  | 0.48                   | 0.56   | -0.98 | -0.38                  | 0.99   | 0.14  |
| LDH-ROS    | 0.51                  | 0.90   | -0.27 | -0.53                  | -0.41  | -0.74 | 0.44                   | -0.75  | 0.25  |
| LDH-AOX    | -0.56                 | -0.92  | 0.36  | 0.20                   | 0.77   | -0.80 | -0.05                  | -0.57  | 0.85  |
| LDH-SOD    | 1.00                  | -0.69  | 0.98  | 0.93                   | -0.57  | 0.24  | 0.25                   | -0.88  | 0.54  |
| LDH-GLU    | -0.99                 | 0.60   | 1.00  | -0.17                  | 0.96   | 0.05  | -0.62                  | -0.70  | -0.24 |

(b)

|         | 0.02 mM BSA |        |       | 0.05 mM BSA |        |       | 0.2 mM BSA |        |       |
|---------|-------------|--------|-------|-------------|--------|-------|------------|--------|-------|
|         | Low         | Medium | High  | Low         | Medium | High  | Low        | Medium | High  |
| MTT-CCK | 0.99        | 0.99   | 0.97  | 0.64        | 0.97   | 0.63  | 0.97       | 0.99   | 0.90  |
| MTT-LDH | -0.58       | 0.31   | 0.98  | 0.88        | 0.27   | 0.65  | 0.33       | 0.66   | 0.90  |
| MTT-ROS | 0.55        | -0.33  | -0.63 | -0.73       | -0.72  | -0.51 | -0.29      | -0.38  | 0.32  |
| MTT-AOX | 0.86        | 0.56   | 0.64  | -0.40       | 0.60   | 0.66  | 0.85       | -0.47  | 0.14  |
| MTT-SOD | -0.63       | 0.72   | -0.25 | 0.24        | 0.92   | 0.90  | 0.81       | 0.86   | -0.73 |
| MTT-GLU | 0.00        | -0.89  | 0.18  | 0.52        | 0.36   | 0.44  | 0.99       | 0.75   | 0.62  |
| CCK-ROS | 0.46        | -0.23  | -0.43 | -0.83       | -0.54  | -0.82 | -0.44      | -0.30  | 0.43  |
| CCK-AOX | 0.90        | 0.49   | 0.44  | 0.36        | 0.65   | 0.48  | 0.79       | -0.35  | 0.49  |
| CCK-SOD | -0.69       | 0.72   | -0.09 | 0.50        | 0.79   | 0.25  | 0.66       | 0.91   | -0.57 |
| CCK-GLU | -0.04       | -0.89  | 0.26  | 0.91        | 0.43   | 0.92  | 0.99       | 0.79   | 0.22  |
| LDH-CCK | -0.49       | 0.27   | 0.95  | 0.29        | 0.36   | -0.18 | 0.19       | 0.71   | 0.62  |
| LDH-ROS | -0.94       | -0.26  | -0.65 | -0.62       | -0.24  | 0.23  | -0.31      | -0.50  | 0.13  |
| LDH-AOX | -0.15       | 0.86   | 0.63  | -0.77       | -0.39  | 0.25  | -0.05      | 0.01   | -0.26 |
| LDH-SOD | -0.17       | -0.38  | -0.10 | -0.20       | 0.17   | 0.87  | 0.77       | 0.56   | -0.76 |
| LDH-GLU | -0.24       | -0.65  | 0.36  | 0.31        | 0.99   | -0.38 | 0.31       | 0.99   | 0.90  |

**Supplementary Figure 6.** Correlation analysis between A549 cell responses and binding and oxidative characteristics of BSA. (a) PET MNP treatment stage relationship, (b) BSA concentration relationship

(a)

| Cytotoxicity and oxidative parameters | Exposure concentration to A549 | Ksv   |       |       | Folding |       |       | Aromatic side chain |       |       | Zeta potentials |       |       | DTT   |       |       | ROS   |       |       |
|---------------------------------------|--------------------------------|-------|-------|-------|---------|-------|-------|---------------------|-------|-------|-----------------|-------|-------|-------|-------|-------|-------|-------|-------|
|                                       |                                | 2 h   | 24 h  | 48 h  | 2 h     | 24 h  | 48 h  | 2 h                 | 24 h  | 48 h  | 2 h             | 24 h  | 48 h  | 2 h   | 24 h  | 48 h  | 2 h   | 24 h  | 48 h  |
| MTT                                   | low                            | 1.00  | -0.70 | 0.96  | 0.65    | -0.82 | 0.92  | 0.90                | -0.99 | 0.88  | 0.91            | 0.76  | 0.99  | 0.98  | -0.83 | -0.39 | 0.94  | -0.76 | 0.83  |
|                                       | medium                         | 0.47  | -0.89 | 0.88  | -0.43   | -0.58 | 0.93  | 0.77                | -0.98 | 0.83  | 0.00            | 0.93  | 0.83  | 0.57  | -0.97 | 0.36  | 0.06  | -0.93 | 0.98  |
|                                       | high                           | -0.89 | -0.32 | 0.75  | -0.89   | -0.99 | 0.66  | -0.66               | -0.83 | 0.81  | -1.00           | 0.41  | 0.81  | -0.83 | -0.50 | -0.75 | -1.00 | -0.40 | 0.54  |
| CCK                                   | low                            | 0.91  | 0.60  | 0.96  | 0.20    | 0.88  | 0.92  | 1.00                | 0.87  | 0.98  | 0.60            | -0.68 | 0.98  | 0.93  | 0.75  | -0.40 | 0.65  | 0.67  | 0.83  |
|                                       | medium                         | -0.89 | 0.44  | 0.95  | -0.89   | -0.82 | 0.98  | -0.67               | -0.21 | 0.92  | -1.00           | -0.34 | 0.91  | -0.84 | 0.24  | 0.18  | -1.00 | 0.35  | 1.00  |
|                                       | high                           | -0.94 | 0.99  | 0.92  | -0.83   | 0.31  | 0.86  | -0.75               | 0.87  | 0.93  | -0.99           | -1.00 | 0.96  | -0.90 | 1.00  | -0.51 | -1.00 | 1.00  | 0.77  |
| LDH                                   | low                            | 0.99  | 0.99  | -0.11 | 0.45    | 0.01  | 0.01  | 0.98                | 0.69  | -0.20 | 0.78            | -0.97 | -0.21 | 1.00  | 0.94  | 1.00  | 0.82  | 0.97  | 0.17  |
|                                       | medium                         | 0.09  | -0.51 | 0.91  | -0.75   | -0.93 | 0.96  | 0.45                | -0.93 | 0.87  | -0.40           | 0.59  | 0.87  | 0.21  | -0.67 | 0.28  | -0.34 | -0.58 | 0.99  |
|                                       | high                           | -0.49 | -0.93 | 0.52  | -0.99   | -0.51 | 0.62  | -0.13               | -0.96 | 0.44  | -0.85           | 0.96  | 0.43  | -0.38 | -0.99 | 0.78  | -0.81 | -0.96 | 0.74  |
| ROS                                   | low                            | 0.50  | -0.31 | 0.83  | -0.40   | 0.89  | 0.89  | 0.79                | 0.34  | 0.78  | 0.03            | 0.22  | 0.77  | 0.60  | -0.11 | 0.44  | 0.09  | -0.23 | 0.95  |
|                                       | medium                         | -0.50 | -0.39 | -0.96 | -0.99   | 0.85  | -0.91 | -0.15               | 0.26  | -0.98 | -0.85           | 0.30  | -0.98 | -0.40 | -0.20 | 0.41  | -0.82 | -0.31 | -0.84 |
|                                       | high                           | -0.58 | -0.67 | -0.92 | -1.00   | 0.62  | -0.86 | -0.24               | -0.08 | -0.95 | -0.90           | 0.60  | -0.95 | -0.48 | -0.51 | 0.52  | -0.87 | -0.60 | -0.77 |
| Antiox                                | low                            | -0.41 | 0.34  | 1.00  | 0.49    | 0.98  | 1.00  | -0.72               | 0.85  | 0.98  | 0.08            | -0.43 | 0.99  | -0.51 | 0.53  | -0.07 | 0.01  | 0.43  | 0.98  |
|                                       | medium                         | 0.30  | 0.17  | -0.86 | 0.93    | -0.95 | -0.79 | -0.07               | -0.48 | -0.90 | 0.72            | -0.07 | -0.90 | 0.19  | -0.04 | 0.62  | 0.68  | 0.08  | -0.68 |
|                                       | high                           | -0.64 | 0.97  | 0.89  | 0.24    | -0.10 | 0.94  | -0.88               | 0.60  | 0.85  | -0.19           | -0.94 | 0.84  | -0.72 | -0.89 | 0.33  | -0.25 | 0.94  | 0.98  |
| GR                                    | low                            | -0.96 | -0.31 | -0.71 | -0.33   | -0.99 | -0.79 | -1.00               | -0.83 | -0.64 | -0.70           | 0.40  | -0.63 | -0.98 | -0.50 | -0.61 | -0.75 | -0.39 | -0.88 |
|                                       | medium                         | -0.74 | -0.24 | -0.35 | -0.98   | -1.00 | -0.47 | -0.44               | -0.79 | -0.27 | -0.97           | 0.33  | -0.26 | -0.66 | -0.43 | -0.88 | -0.95 | -0.32 | -0.60 |
|                                       | high                           | -0.47 | 0.32  | 0.71  | -0.99   | -0.89 | 0.61  | -0.11               | -0.33 | 0.77  | -0.83           | -0.22 | 0.77  | -0.36 | 0.12  | -0.80 | -0.80 | 0.23  | 0.48  |
| SOD                                   | low                            | 0.99  | 0.86  | 0.93  | 0.45    | -0.36 | 0.97  | 0.98                | 0.37  | 0.90  | 0.78            | -0.81 | 0.89  | 1.00  | 0.74  | 0.23  | 0.82  | 0.81  | 1.00  |
|                                       | medium                         | -0.78 | 1.00  | -1.00 | 0.04    | 0.23  | -0.98 | -0.96               | 0.83  | -1.00 | -0.39           | -1.00 | -1.00 | -0.85 | 0.99  | 0.20  | -0.45 | 1.00  | -0.94 |
|                                       | high                           | -0.29 | 0.14  | -0.44 | -0.94   | -0.96 | -0.33 | 0.08                | -0.50 | -0.52 | -0.71           | -0.04 | -0.53 | -0.18 | -0.07 | 0.95  | -0.67 | 0.05  | -0.17 |

(b)

| Cytotoxicity and oxidative parameters | Exposure concentration to A549 | Ksv     |         |        | Folding |         |        | Aromatic side chain |         |        | Zeta potentials |         |        | ROS     |         |        | DTT     |         |        |
|---------------------------------------|--------------------------------|---------|---------|--------|---------|---------|--------|---------------------|---------|--------|-----------------|---------|--------|---------|---------|--------|---------|---------|--------|
|                                       |                                | 0.02 mM | 0.05 mM | 0.2 mM | 0.02 mM | 0.05 mM | 0.2 mM | 0.02 mM             | 0.05 mM | 0.2 mM | 0.02 mM         | 0.05 mM | 0.2 mM | 0.02 mM | 0.05 mM | 0.2 mM | 0.02 mM | 0.05 mM | 0.2 mM |
| MTT                                   | low                            | 0.88    | 0.76    | -0.63  | 0.90    | -0.35   | -0.50  | 0.23                | -0.03   | -0.38  | 0.25            | -0.50   | 0.20   | 0.92    | -0.65   | 0.57   | 0.44    | -0.82   | -0.77  |
|                                       | medium                         | -0.64   | -0.63   | 0.71   | -0.60   | -0.64   | 0.81   | 0.91                | -0.37   | 0.88   | 0.90            | -0.77   | 1.00   | -0.57   | -0.36   | 0.88   | -0.97   | -0.58   | -0.72  |
|                                       | high                           | 0.46    | 0.02    | -0.59  | 0.50    | 0.47    | -0.47  | 0.74                | 0.73    | -0.34  | 0.75            | 0.32    | 0.24   | 0.53    | -1.00   | 0.61   | -0.15   | -0.97   | -0.80  |
| CCK                                   | low                            | 0.30    | 0.99    | -0.95  | 0.25    | -0.82   | -0.89  | -1.00               | -0.59   | -0.82  | -1.00           | -0.90   | -0.35  | 0.22    | -0.11   | 0.04   | 0.80    | -0.36   | -0.31  |
|                                       | medium                         | 0.89    | -0.10   | -0.50  | 0.91    | -1.00   | -0.37  | 0.20                | -0.96   | -0.24  | 0.22            | -0.97   | 0.34   | 0.93    | 0.53    | 0.69   | 0.46    | 0.30    | -0.85  |
|                                       | high                           | -0.67   | -0.40   | -0.70  | -0.71   | 0.80    | -0.59  | -0.54               | 0.95    | -0.47  | -0.56           | 0.68    | 0.10   | -0.73   | -0.91   | 0.49   | -0.11   | -0.78   | -0.70  |
| LDH                                   | low                            | 0.89    | 1.00    | 0.76   | 1.00    | -0.82   | 0.85   | -0.12               | -0.68   | 0.91   | -0.10           | -0.91   | 0.98   | 1.00    | -0.10   | 0.84   | 0.72    | -0.35   | -0.66  |
|                                       | medium                         | -0.24   | 0.90    | 0.81   | -0.19   | -0.58   | 0.89   | 1.00                | -0.61   | 0.95   | 1.00            | -0.71   | 0.97   | -0.16   | -0.44   | 0.79   | -0.76   | -0.65   | -0.60  |
|                                       | high                           | 0.58    | -0.08   | 0.01   | 0.62    | -0.42   | -0.14  | 0.63                | 1.00    | -0.27  | 0.65            | -0.26   | -0.76  | 0.65    | 1.00    | -0.96  | 0.00    | 0.98    | 1.00   |
| ROS                                   | low                            | -1.00   | -1.00   | -0.90  | 0.59    | 0.88    | -0.83  | 0.29                | 0.66    | -0.74  | 0.51            | -0.10   | -0.62  | -0.99   | 0.02    | 0.16   | -0.83   | 0.27    | -0.41  |
|                                       | medium                         | -0.92   | -0.99   | -0.04  | 0.07    | 0.78    | -0.18  | -0.15               | 0.55    | -0.32  | -0.27           | -0.67   | -0.34  | -0.94   | 0.16    | -0.97  | -0.51   | 0.41    | 1.00   |
|                                       | high                           | -0.93   | -1.00   | -0.95  | -0.37   | 0.83    | -0.98  | -0.10               | 0.61    | 1.00   | -0.38           | -0.31   | 0.06   | -0.96   | 0.09    | -0.58  | -0.55   | 0.34    | 0.34   |
| Antiox                                | low                            | 0.92    | -0.83   | -0.93  | 0.88    | 0.45    | -0.87  | -0.62               | 0.14    | -0.79  | 0.36            | 0.81    | 0.63   | 0.89    | 0.57    | 0.08   | 0.95    | 0.76    | -0.34  |
|                                       | medium                         | 0.33    | 0.08    | 0.70   | 0.74    | -0.56   | 0.59   | 0.83                | -0.79   | 0.47   | 0.88            | -0.16   | -0.28  | 0.40    | 1.00    | -0.49  | -0.29   | 0.94    | 0.70   |
|                                       | high                           | 0.99    | 0.95    | -0.98  | 0.36    | -0.98   | -0.95  | -0.10               | -0.87   | -0.90  | 0.25            | -0.22   | -0.33  | 1.00    | 0.31    | -0.11  | 0.70    | 0.06    | -0.16  |
| GR                                    | low                            | -0.61   | 0.49    | 0.35   | -0.16   | 0.00    | 0.21   | 0.93                | 0.32    | 0.07   | 0.70            | -0.21   | -0.40  | 0.08    | 0.71    | -0.96  | -0.17   | -0.87   |        |
|                                       | medium                         | 0.53    | -0.56   | -0.70  | -0.89   | 0.89    | -0.80  | -0.96               | 0.99    | 0.87   | -0.90           | 0.20    | -0.88  | 0.46    | -0.44   | 0.69   | 0.92    | -0.65   | -0.47  |
|                                       | high                           | -0.46   | 0.61    | -0.71  | 0.11    | -0.14   | -0.80  | 0.98                | 0.18    | -0.88  | 0.90            | -0.47   | 0.91   | -0.39   | -0.33   | -0.39  | -0.89   | -0.56   | 0.62   |
| SOD                                   | low                            | -0.62   | 0.96    | -0.86  | -0.98   | -0.69   | -0.92  | -0.60               | -0.43   | -0.97  | -0.79           | -0.64   | 0.10   | -0.68   | 0.98    | 0.97   | -0.04   | 1.00    | -1.00  |
|                                       | medium                         | 0.70    | 0.64    | -0.20  | 0.74    | -0.17   | -0.34  | -0.87               | 0.15    | -0.47  | -0.01           | -0.56   | 0.25   | 0.65    | 0.57    | -0.96  | 0.99    | 0.34    | 1.00   |
|                                       | high                           | -0.79   | 0.22    | -0.03  | -0.14   | 0.29    | 0.12   | 0.80                | 0.58    | 0.26   | 0.56            | -0.14   | 0.99   | -0.74   | 0.91    | -0.97  | -1.00   | 0.78    | 0.88   |
